# Supplementary material for: High n-3 fatty acids counteract hyperglycemia-induced insulin resistance in fat-1 miceviapre-adipocyte NLRP3 inflammasome inhibition
Source: Royal Society of Chemistry journal article supplement (doi:10.1039/d0fo02092c), 2020-11-27
Supplement: d0fo02092c1.pdf [file d0fo02092c1.pdf]

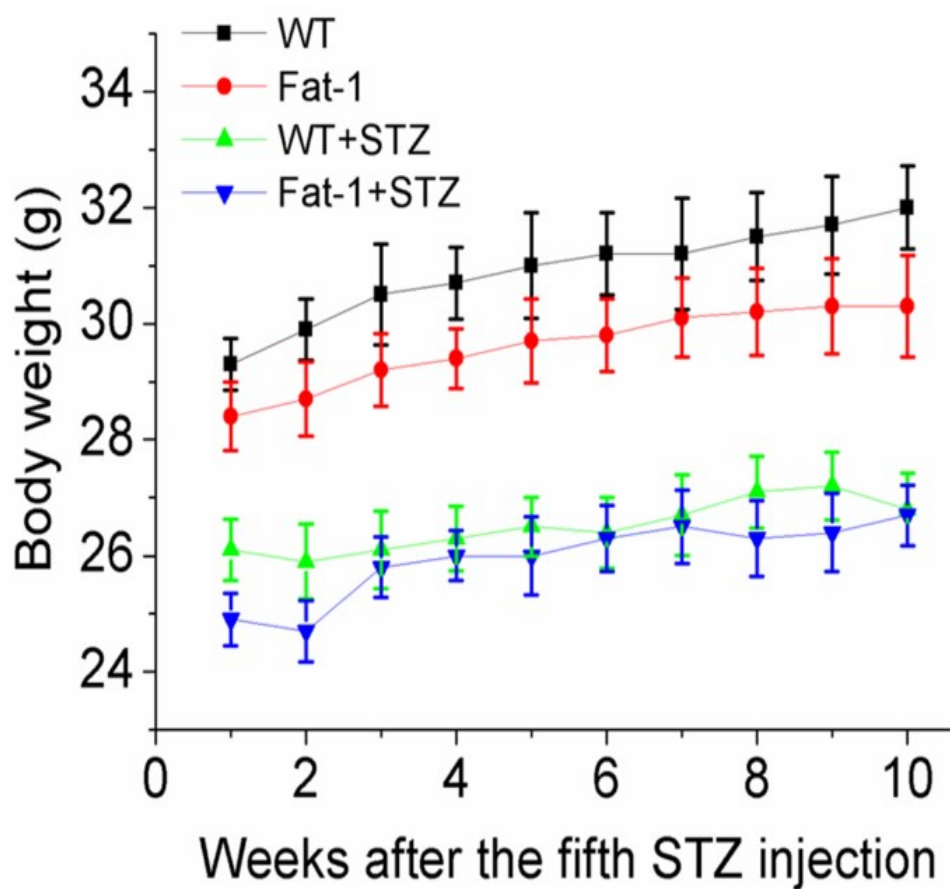

Fig. S1 Effect of STZ on body weight in fat-1 and WT mice. Values are the mean+SEM, n=6.

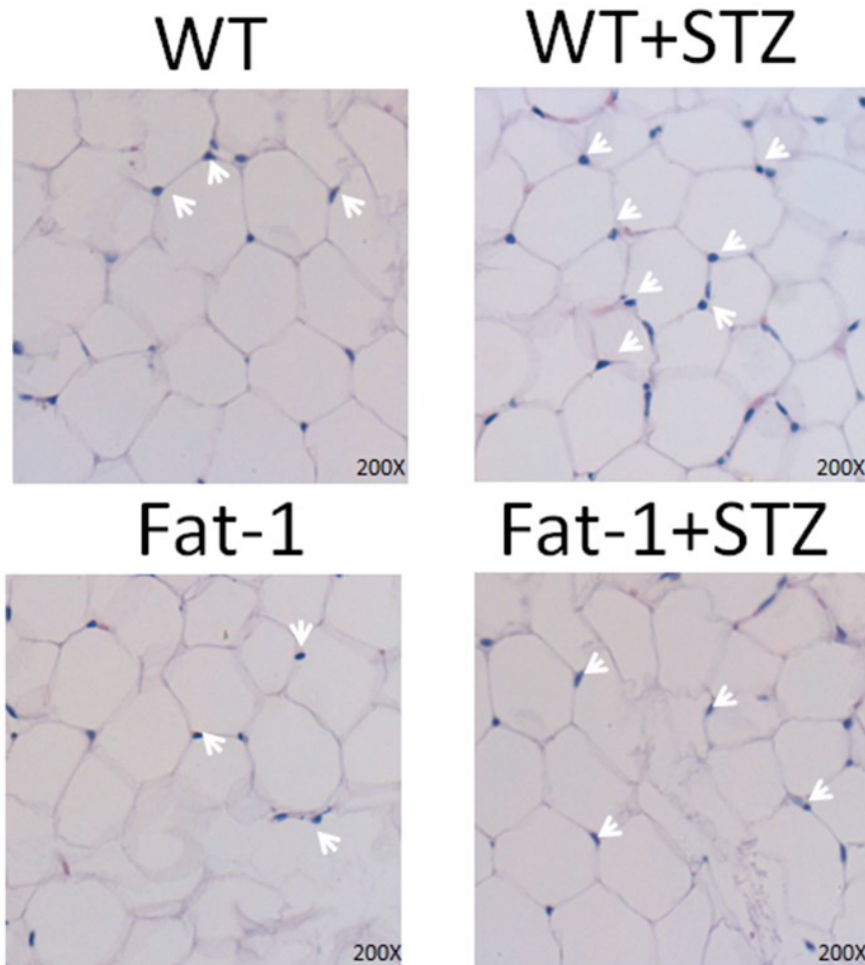

Fig. S2 Effect of STZ on adipose tissue expansion in fat-1 and WT mice. 75 days after the fifth STZ injection or citrate as control, mice were killed and HE staining of white adipose tissues was performed. White arrows indicate inflammatory cells.

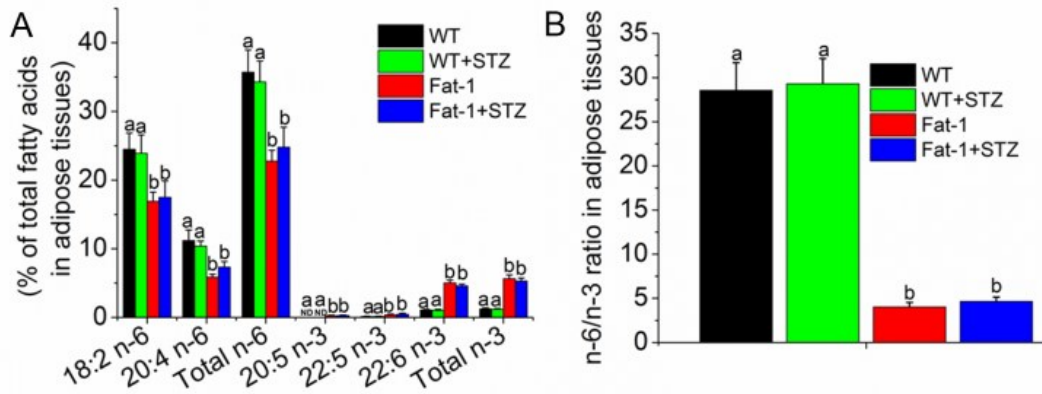

Fig. S3 Fatty acid composition in adipose tissues from control or STZ-treated WT and fat-1 mice. 75 days after the fifth STZ treatment, adipose tissues from WT, Fat-1, WT+STZ, and Fat-1+STZ were isolated (n=4). (A) Adipose tissue profiles of major n-6 and n-3 PUFAs, total n-6, and total n-3. (B) Ratio of n-6/n-3 PUFA of adipose tissues. Different letters denote groups that were significantly different ( $P < 0.05$ ). ND, not detectable. WT, citrate-treated WT mice; WT+STZ, STZ-treated WT mice; Fat-1, citrate-treated fat-1 mice; Fat-1+STZ, STZ-treated fat-1 mice.
